# Supplementary material for: Group-I PAKs-mediated phosphorylation of HACE1 at serine 385 regulates its oligomerization state and Rac1 ubiquitination
Source: PubMed Central journal article supplement (PMC5780496; doi:10.1038/s41598-018-19471-2), 2018-01-23

## **Supplementary Information**

### **Group-I PAKs-mediated phosphorylation of HACE1 at serine 385 regulates its oligomerization state and Rac1 ubiquitination**

Maria I. Acosta, Serge Urbach, Anne Doye, Yuen-Wai Ng, Jérôme Boudeau, Amel Mettouchi, Anne Debant, Edward Manser, Orane Visvikis, Emmanuel Lemichez

**Supplementary Figure S1: Identification of two phosphorylation sites of HACE1.**

**a-d.** Fragmentation spectra of HACE1 phospho-peptides showing that Ser-337 and Ser-385 are phosphorylated. **e.** Graph showing the occurrence of HACE1 phospho-peptides in CNF1 treated cells relative to control conditions. **f.** Protein lysates from HUVECs transfected with HA-HACE1(WT) and treated with CNF1 at  $10^{-9}$  M for 24 hours were treated or not with  $\lambda$ -phosphatase ( $\lambda$ -PPase) and analyzed by immunoblot (IB) using the indicated antibodies. IB: actin is used as a loading control. **g.** Graph showing levels of pS337 relative to HACE1 total protein levels quantified by densitometry from the IB analysis. **e-g.** Data correspond to the mean  $\pm$  SD of > 3 biological replicates. p value was determined by one-sample t-test.

**Supplementary Figure S2: CNF1 and Rac1 induce phosphorylation at Ser-385.**

**a-b.** Protein lysates from MCF12A cells transfected with HA-HACE1(WT) and **(a)** treated with CNF1 for 24 hours or **(b)** co-transfected with myc-Rac1(Q61L) and analyzed by immunoblot (IB) using the indicated antibodies. IB: actin is used as a loading control.

**Supplementary Figure S3: Phosphorylation of HACE1 at Ser-385 is independent of mTOR signaling.**

HUVECs transfected with the indicated plasmids were treated with rapamycin (0.1  $\mu$ M) or Torin1 (0.1 M) for 4 hours prior to lysis and analysis by immunoblot (IB) using the indicated antibodies. IB: actin is used as a loading control and pS6 is used as a control for mTOR activation.

**Supplementary Figure S4: Group I PAKs induce the direct phosphorylation of HACE1.**

**a.** NetPhorest software analysis of the sequence surrounding Ser-385 identified a conserved PAK consensus motif. **b-c.** Protein lysates from MCF12A cells transfected with siRNA mix targeting PAK2 **(c)** and with plasmids expressing HA-HACE1 and Cdc42(Q61L) or **(b)** intoxicated with CNF1 for 24 hours were analyzed by immunoblot (IB) using the indicated

antibodies. **d-e.** Protein lysates from MCF12A cells transfected with plasmids expressing HA-HACE1 and **(d)** Rac1(Q61L) or **(e)** Cdc42(Q61L) or **(d)** intoxicated with CNF1 for 24 hours were analyzed by immunoblot (IB) using the indicated antibodies. **f.** Protein lysates from MCF12A cells transfected with HA-HACE1, myc-Rac1(Q61L) and myc-PAK1T423E or myc-PAK1L107F and analyzed by IB using the indicated antibodies.

**Supplementary Figure S5: HACE1 does not induce its own ubiquitination in MCF12A cells.**

Protein lysates from MCF12A cells transfected with the indicated plasmids were subjected to His pull-down (His-PD) prior to immunoblot analysis (IB). Whole cell lysate (WCL) IB analysis showing total protein expression. CS is C876S, SA is S385A, and SE is S385E.

**Supplementary Figure S6: *In vivo* inter-molecular interactions of HACE1 requires HECT binding to the ANK+MID region.**

**a.** Schematic representation of the HACE1 protein indicating the position and size of the ANK and HECT domains as well as the MID region. The structures of the deletion mutants are also represented. **b-d.** Protein lysates from **(b)** HEK293 or **(c-d)** MCF12A cells transfected with the indicated plasmids were subjected to immunoprecipitation (IP) using myc or Flag antibodies prior to immunoblot analysis (IB). Whole cell lysate (WCL) IB analysis shows the total protein expression.

**Supplementary Figure S7: Phosphorylation at Ser-385 does not promote a specific association between HACE1 and 14-3-3 proteins.**

Protein lysates from MCF12A cells transfected with the indicated plasmids were subjected to immunoprecipitation (IP) using HA antibodies prior to IB. Whole cell lysate (WCL) IB analysis shows the total protein expression.

**Supplementary Figure S8: Ser-385 is located within an intrinsically disordered region.**

**a.** Schematic representation of the HACE1 protein that shows Ser-385 within the MID region.

**b-g.** HACE IDR prediction using the PONDR® predictor with the **(b-c)** VT-XL, **(d-e)** XL1-XT and **(f-g)** CaN-XT algorithms. **(b, d, and f)** Graphs represent the PONDR score relative to the residue position. Scores under and above 0.5 correspond to ordered and disordered regions, respectively. **(c, e, and g)** Tables listing the IDR domains found by the 3 algorithms.

**Supplementary Figures S9-S13: Full-length blots and gels showed in the main figures.**

A dashed box within each full-length blot or gel shows the portion of the image presented in the indicated main figure. The text beside each image indicates the type of sample (IP: immuno-precipitate, WCL: whole cell lysate, His-PD: Histidine-pull down), staining (CBB: coomassie brilliant blue), analysis (Autoradiography, IB: immuno-blot), and the antibody used to probe the membrane in the case of IBs.

**Supplementary table S1: Plasmid List**

| #  | Plasmid                          | Reference             | Design                                                                        |
|----|----------------------------------|-----------------------|-------------------------------------------------------------------------------|
| 1  | PKH3-HA3-HACE1(WT)               | Andrio et al. 2017    |                                                                               |
| 2  | PKH3-HA3-HACE1(S385A)            | This study            | mutagenesis of plasmid #1 using primers #1-2                                  |
| 3  | PKH3-HA3-HACE1(S385E)            | This study            | mutagenesis of plasmid #1 using primers #3-4                                  |
| 4  | PKH3-HA3-HACE1(C876S)            | Torrino et al., 2017  |                                                                               |
| 5  | pXJ40-HA-Rac1(Q61L)              | Doye et al., 2002     |                                                                               |
| 6  | pKH3-HA3-HA-Cdc42(Q61L)          | Doye et la., 2006     |                                                                               |
| 7  | pKH3-HA3-HA-RhoA(L63)            | Doye et la., 2006     |                                                                               |
| 8  | pRK5-myc-HACE1(WT)               | Andrio et al., 2017   |                                                                               |
| 9  | pRK5-myc-HACE1(S385A)            | This study            | mutagenesis of plasmid #8 using primers #1-2                                  |
| 10 | pRK5-myc-HACE1(S385E)            | This study            | mutagenesis of plasmid #8 using primers #3-4                                  |
| 11 | pXJ40-HA -Rac1(T17N)             | Doye et el., 2002     |                                                                               |
| 12 | pKH3-HA3-Cdc42(T17N)             | This study            | mutagenesis of pKH3-HA3-Cdc42WT (Doye et al., 2006) using primers #7-6        |
| 13 | pRK5-myc-Rac1(Q61L)              | Visvikis et al., 2008 |                                                                               |
| 14 | 6His-HACE1(WT)                   | Torrino et al., 2011  |                                                                               |
| 15 | 6His-HACE1(C876S)                | This study            | mutagenesis of plasmid #14 using primers #5-6                                 |
| 16 | 6His-HACE1(S385A)                | This study            | mutagenesis of plasmid #14 using primers #1-2                                 |
| 17 | 6His-HACE1(S385E)                | This study            | mutagenesis of plasmid #14 using primers #3-4                                 |
| 18 | pSY5M-6His-PAK1                  | This study            | See methods                                                                   |
| 19 | pXJ-Flag-PAK1(K141A)             | This study            | Mutagenesis of plasmid pXJ-Flag-PAK1 (Ng et al., 2010) using primers #7-8     |
| 20 | pXJ40-GST-KID2 (85-144)          | This study            | See methods                                                                   |
| 21 | pCMV6M-myc-PAK1(T423E)           | Sells et al., 1997    | pCMV6M-PAK1 T423E was a gift from Jonathan Chernoff (Addgene plasmid # 12208) |
| 22 | pCMV6M-myc-PAK1(L107F)           | Xiao et al., 2002     | pCMV6M-PAK1 L107F was a gift from Jonathan Chernoff (Addgene plasmid # 12212) |
| 23 | pRGB4-6His-Ub                    | Doye et al., 2006     |                                                                               |
| 24 | pKH3-HA3-ANK (1-257aa)           | Andrio et al, 2017    |                                                                               |
| 25 | pKH3-HA3-MID (258-571aa)         | Andrio et al, 2017    |                                                                               |
| 26 | pKH3-HA3-HECT (574-909aa)        | Andrio et al, 2017    |                                                                               |
| 27 | pKH3-HA3-ANK+MID (1-571)         | Andrio et al, 2017    |                                                                               |
| 28 | pKH3-HA3-MID+HECT (258-909aa)    | Andrio et al, 2017    |                                                                               |
| 29 | pCMV-Tag2B-Flag-ANK+MID (1-574a) | Andrio et al, 2017    |                                                                               |

- Andrio, E. et al. Identification of cancer-associated missense mutations in *hace1* that impair cell growth control and Rac1 ubiquitylation. *Sci. Rep.* 1–11 (2017).
- Doye, A., Boyer, L., Mettouchi, A. & Lemichez, E. Ubiquitin-mediated proteasomal degradation of Rho proteins by the CNF1 toxin. *Meth. Enzymol.* 406, 447–456 (2006).
- Torrino, S. et al. The E3 ubiquitin-ligase HACE1 catalyzes the ubiquitylation of active Rac1. *Dev Cell* 21, 959–965 (2011).
- Visvikis, O. et al. Activated Rac1, but not the tumorigenic variant Rac1b, is ubiquitinated on Lys 147 through a JNK-regulated process. *FEBS J.* 275, 386–396 (2008).
- Ng, Y. W. et al. Why an A-loop phospho-mimetic fails to activate PAK1: understanding an inaccessible kinase state by molecular dynamics simulations. *Structure* 18, 879–890 (2010).
- Sells, M.A. et al. Human p21-activated kinase (Pak1) regulates actin organization in mammalian cells. *J. Curr Biol.* 7, 202-210 (1997)
- Xiao, G.H. et al. p21-activated kinase links Rac/Cdc42 signaling to merlin. *J Biol Chem.* 277, 883-886 (2002).

**Supplementary table S2: Primer List**

| #  | Primer name      | Sequence                                                                             |
|----|------------------|--------------------------------------------------------------------------------------|
| 1  | HACE1(S385A)-Fw  | 5'- GAA TTG ATG AAA AAC AAA AGA GAC GCA ACA GAG<br>ATC ACT TCT ATT TTA C             |
| 2  | HACE1(S385A)-Rev | 5'- GTA AAA TAG AAG TGA TCT CTG TTG CGT CTC TTT TGT<br>TTT TCA TCA ATT C             |
| 3  | HACE1(S385E)-Fw  | 5'- CAC AGA ATT GAT GAA AAA CAA AAG AGA CGA AAC<br>AGA GAT CAC TTC TAT TTT ACT GAA A |
| 4  | HACE1(S385E)-Rev | 5'- TTT CAG TAA AAT AGA AGT GAT CTC TGT TTC GTC TCT<br>TTT GTT TTT CAT CAA TTC TGT G |
| 5  | HACE1(C876S)-Fw  | 5'- CTT TTA CCA ACT TCA AGC ACA TCC ATC AAC ATG CTC<br>AAG                           |
| 6  | HACE1(C876S)-Rev | 5'- CTT GAG CAT GTT GAT GGA TGT GCT TGA AGT TGG<br>TAA AAG                           |
| 7  | Cdc42(T17N)-Fw   | 5'- GGT GCT GTT GGT AAA AAC TGT CTC CTG ATA TCC TAC                                  |
| 8  | Cdc42(T17N)-Rev  | 5'- GTA GGA TAT CAG GAG ACA GTT TTT ACC AAC AGC<br>ACC                               |
| 9  | PAK1(K141A)-Fw   | 5'- GTC AGG CGT ACA TGA GTT TTA C                                                    |
| 10 | PAK1(K141A)-Rev  | 5'- GTA CGC CTG ACT ATT GGA G                                                        |

**Supplementary table S3: Antibody List**

| <b>Antibody</b>                                     | <b>Clone Number</b> | <b>Supplier</b>         |
|-----------------------------------------------------|---------------------|-------------------------|
| Mouse monoclonal anti-HA.11                         | 16B12               | Biolegend               |
| Rat monoclonal anti-HA                              | 3F10                | Roche                   |
| Mouse monoclonal anti-GST                           | 26H1                | CST                     |
| Mouse monoclonal anti-Flag                          | M2                  | Sigma-Aldrich           |
| Mouse monoclonal anti-c-Myc                         | 9E10                | Biolegend               |
| Rabbit monoclonal anti-HACE1                        | EPR7962             | Abcam                   |
| Mouse monoclonal anti $\beta$ -Actin                | AC-74               | Sigma-Aldrich           |
| Rabbit polyclonal anti-PAK1                         | N/A                 | CST                     |
| Rabbit polyclonal anti-PAK2                         | N/A                 | CST                     |
| Rabbit polyclonal anti-RhoGDI $\alpha$              | N/A                 | Santa Cruz              |
| Mouse monoclonal anti-Transferrin Receptor          | H68.4               | ThermoFisher Scientific |
| Rabbit polyclonal anti-14-3-3 (pan)                 | N/A                 | CST                     |
| Rabbit polyclonal anti-phospho-PAK1(T423)/PAK(T402) | N/A                 | CST                     |
| Rabbit monoclonal anti-phospho-VEGFR2(T1175)        | 19A10               | CST                     |
| Rabbit polyclonal anti-phospho-S6(S235/236)         | N/A                 | CST                     |
| Rabbit polyclonal anti-phospho-HACE1S385 (pS385)    | N/A                 | This study*             |
| Rabbit polyclonal anti-phospho-HACE1S337(pS337)     | N/A                 | This study*             |
| Polyclonal swine anti-mouse immunoglobulin HRP      | N/A                 | DAKO                    |
| Polyclonal rabbit anti-rat immunoglobulin HRP       | N/A                 | DAKO                    |
| Polyclonal goat anti-rabbit immunoglobulin HRP      | N/A                 | DAKO                    |

\*See: methods



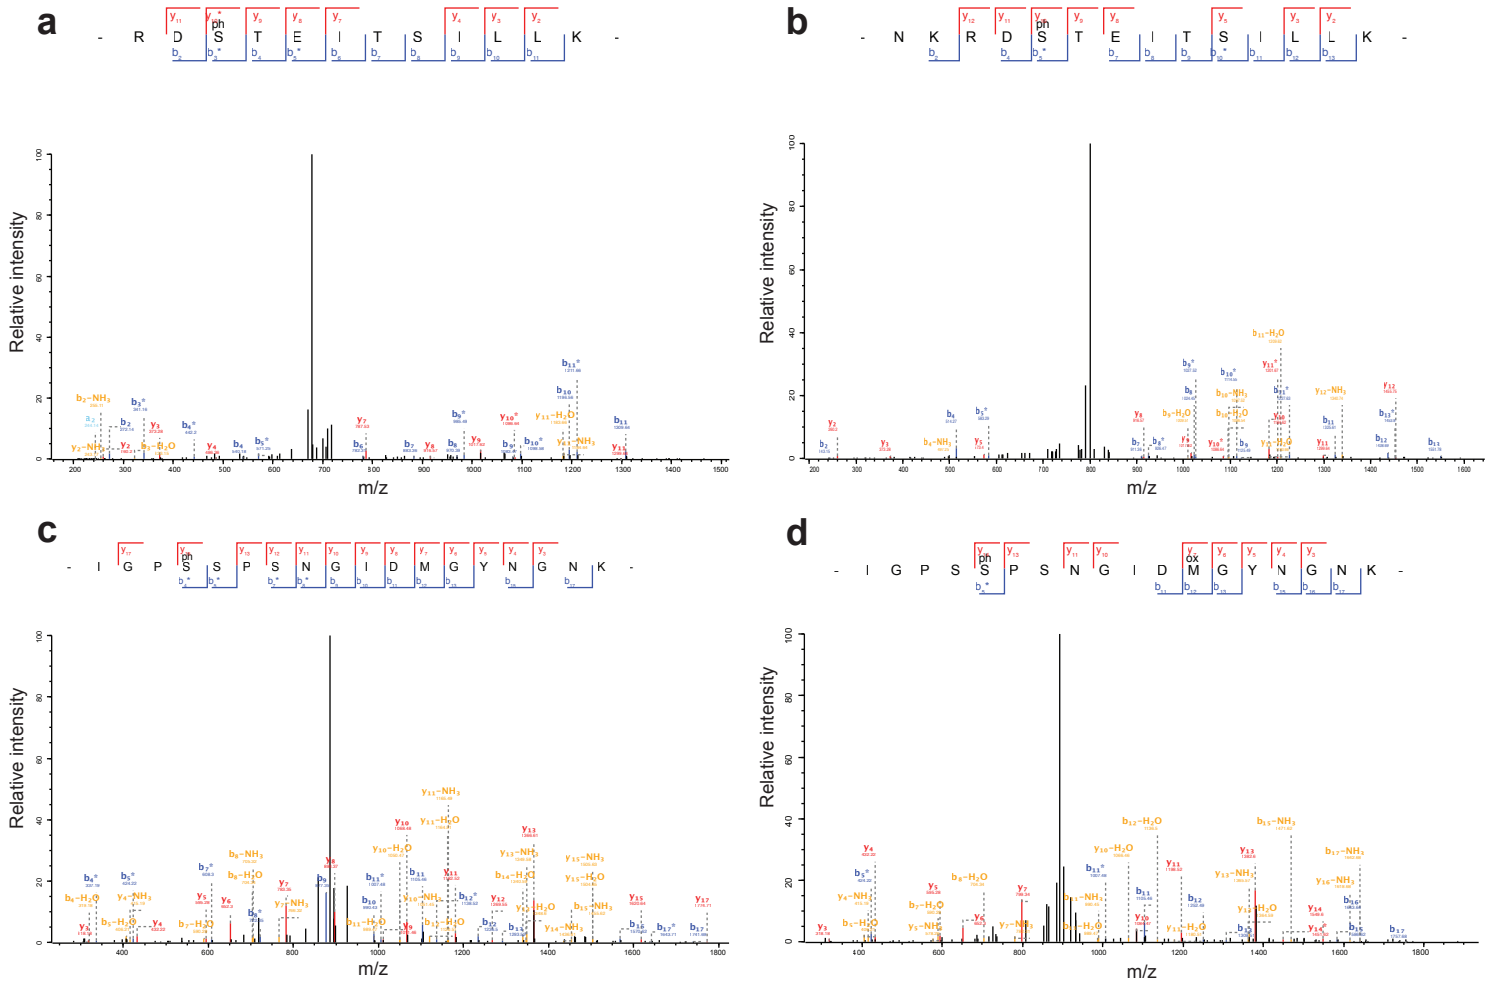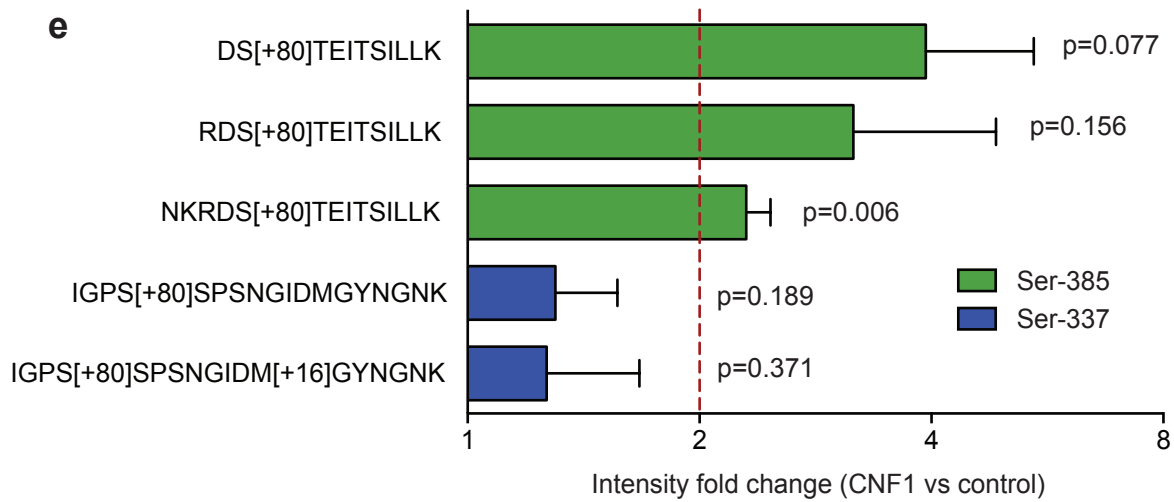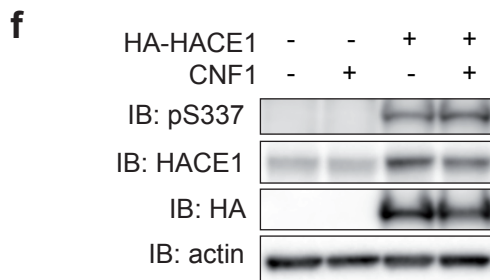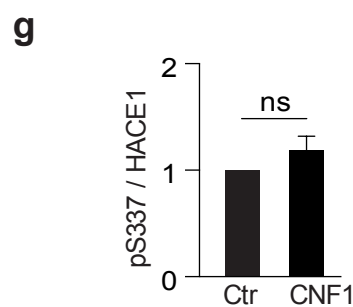

**a**

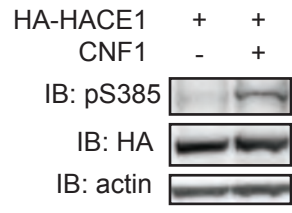

**b**

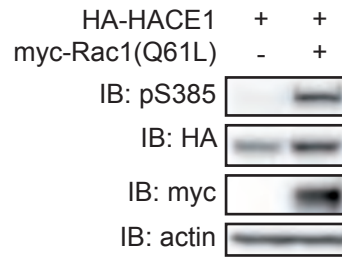

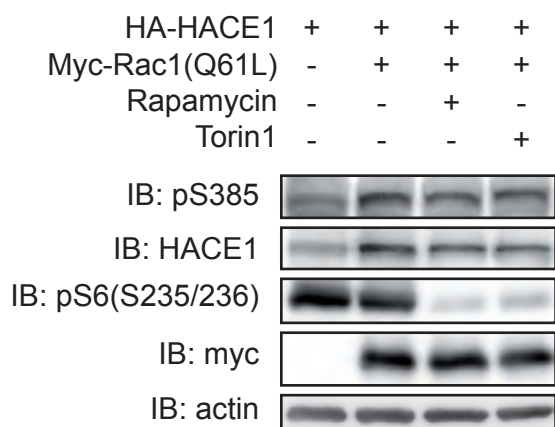

**a** Kinase Family    -5   -4   -3   -2   -1       +1   +2   +3   +4   +5  
 PAK group        K    N    K    R    D    S    T    E    I    T    S

Consensus level

1   2   3   4

**b**

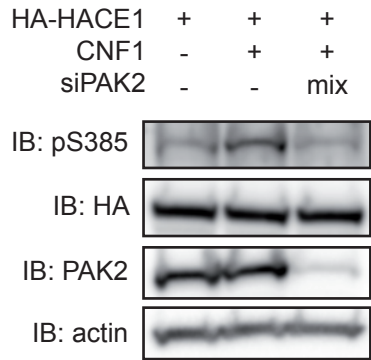

**c**

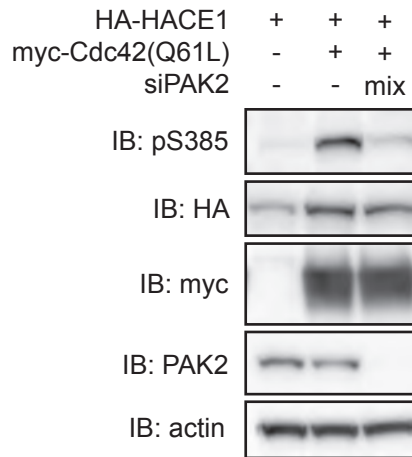

**d**

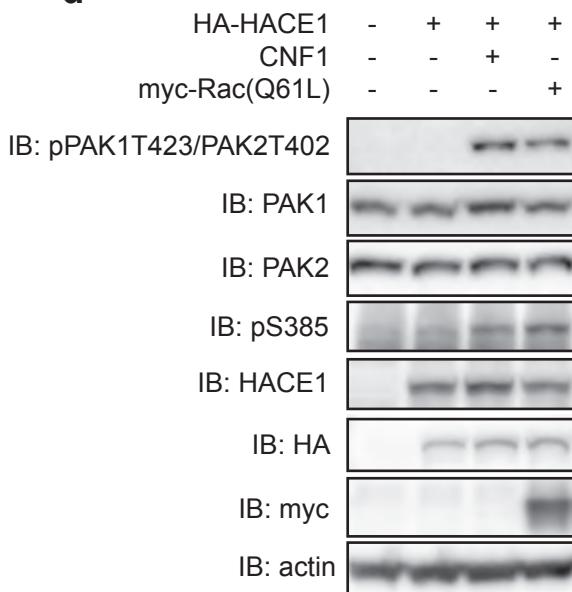

**e**

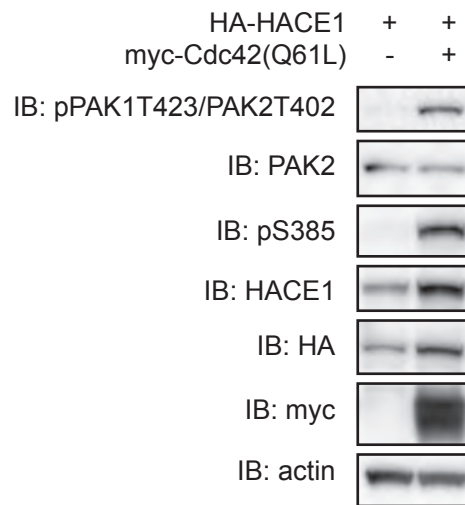

**f**

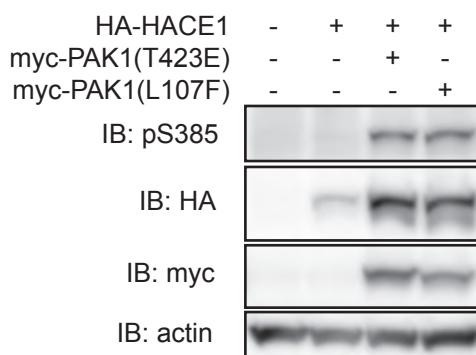

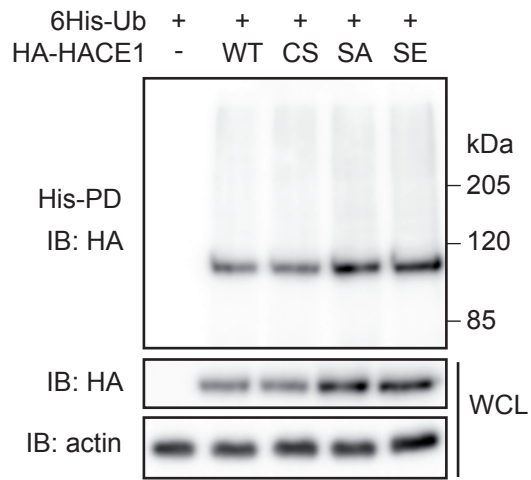

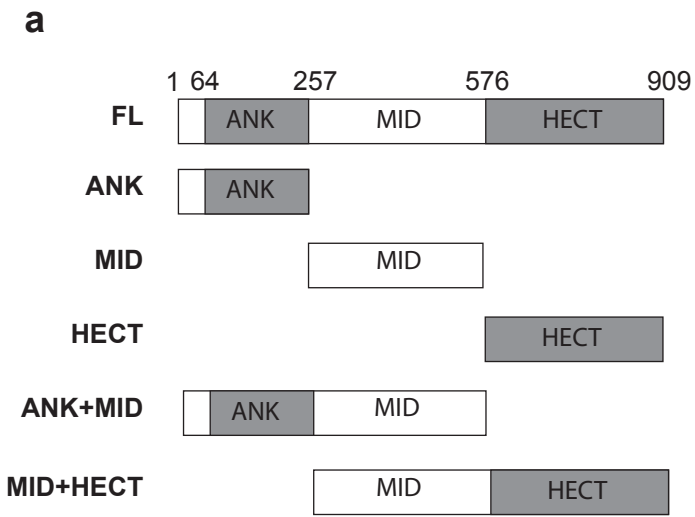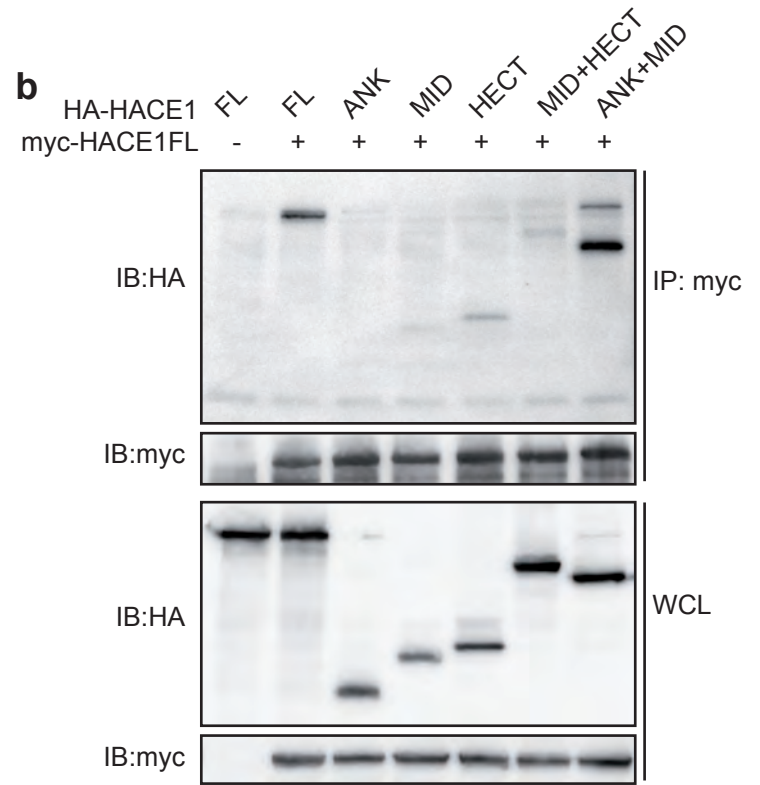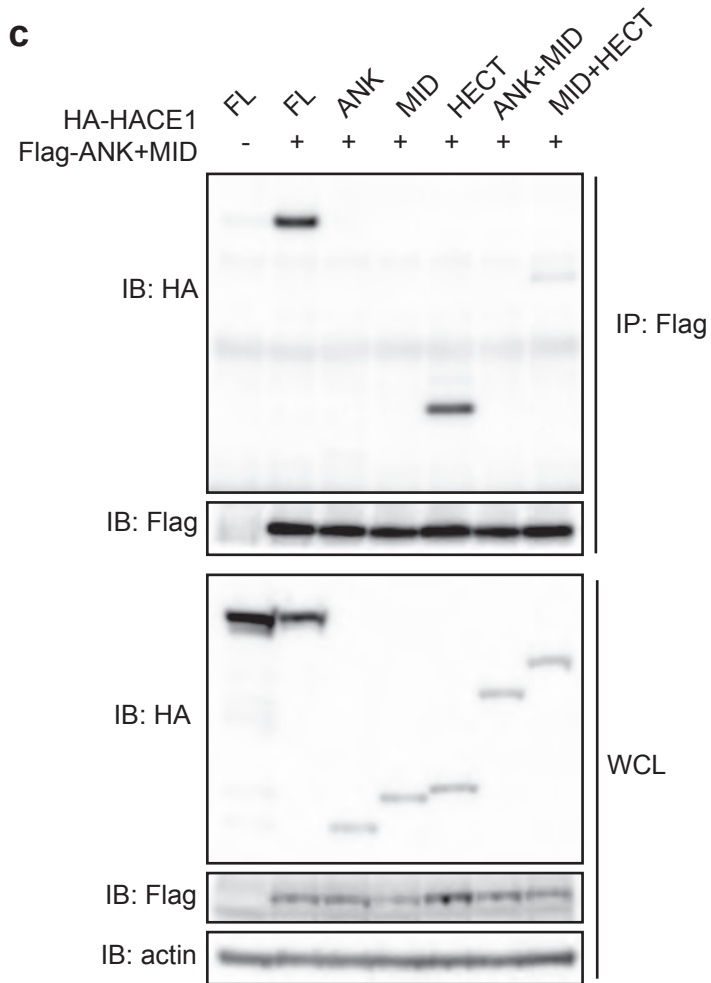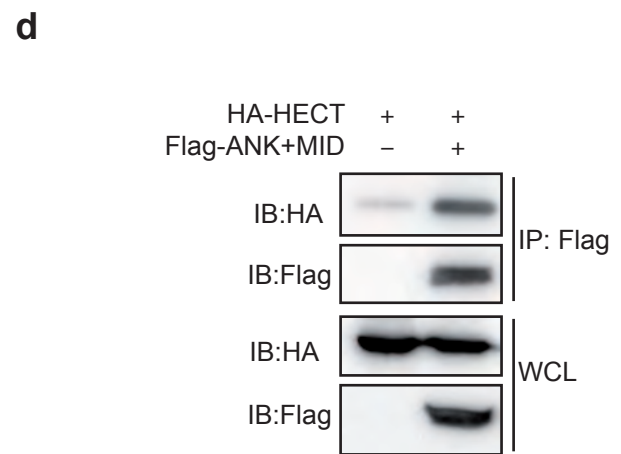

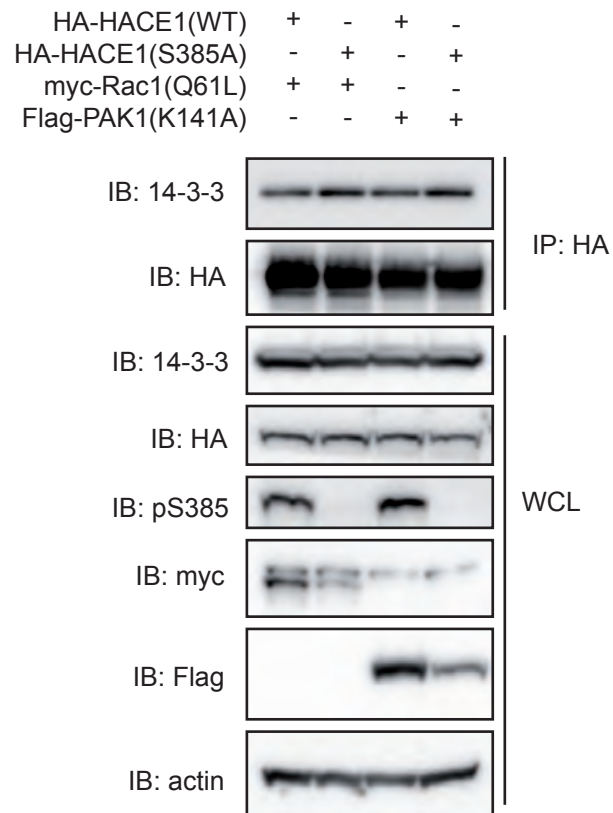

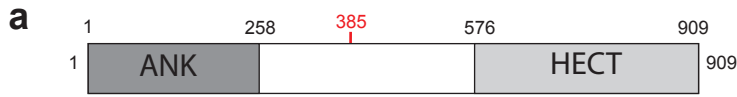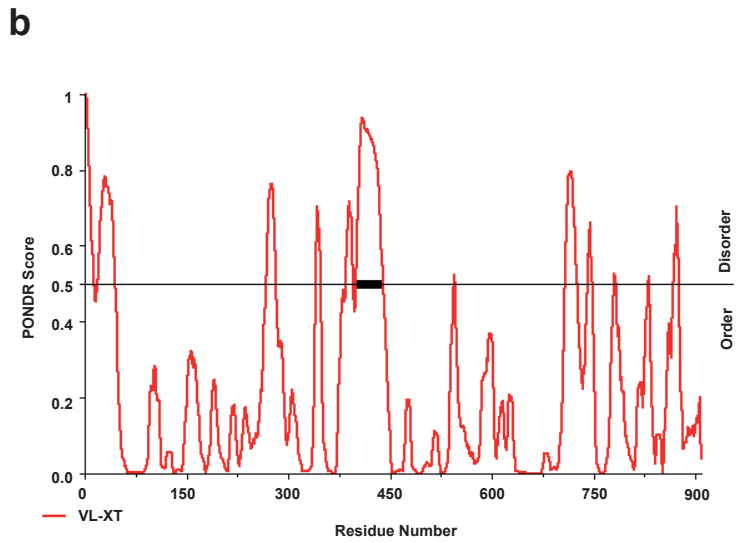

**c**

| VL-XT predicted disorder segment |             |           |      |                  |
|----------------------------------|-------------|-----------|------|------------------|
| IDR                              | starting aa | ending aa | size | average strength |
| 1                                | 1           | 13        | 13   | 0.7777           |
| 2                                | 19          | 45        | 27   | 0.681            |
| 3                                | 267         | 281       | 15   | 0.6685           |
| 4                                | 341         | 347       | 7    | 0.6339           |
| 5                                | 385         | 395       | 11   | 0.6343           |
| 6                                | 400         | 439       | 40   | 0.8115           |
| 7                                | 544         | 545       | 2    | 0.5146           |
| 8                                | 708         | 725       | 18   | 0.6925           |
| 9                                | 741         | 747       | 7    | 0.5837           |
| 10                               | 781         | 782       | 2    | 0.5193           |
| 11                               | 831         | 831       | 1    | 0.5208           |
| 12                               | 868         | 875       | 8    | 0.5907           |

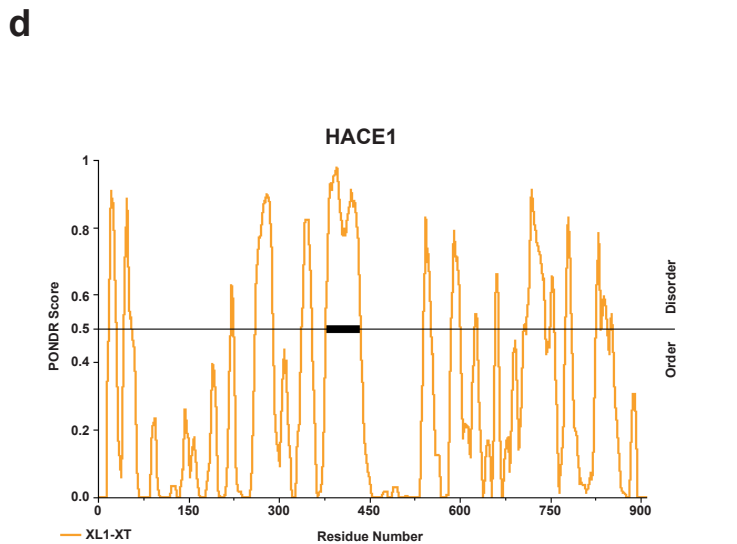

**e**

| XL1-XT predicted disorder segment |             |           |      |                  |
|-----------------------------------|-------------|-----------|------|------------------|
| IDR                               | starting aa | ending aa | size | average strength |
| 1                                 | 18          | 30        | 11   | 0.7369           |
| 2                                 | 44          | 56        | 11   | 0.6615           |
| 3                                 | 220         | 225       | 4    | 0.5783           |
| 4                                 | 261         | 289       | 27   | 0.7900           |
| 5                                 | 338         | 355       | 16   | 0.7059           |
| 6                                 | 378         | 436       | 57   | 0.8320           |
| 7                                 | 541         | 552       | 10   | 0.6923           |
| 8                                 | 587         | 600       | 12   | 0.6830           |
| 9                                 | 625         | 629       | 3    | 0.5317           |
| 10                                | 659         | 664       | 4    | 0.6249           |
| 11                                | 707         | 709       | 1    | 0.5061           |
| 12                                | 711         | 741       | 29   | 0.7218           |
| 13                                | 750         | 757       | 6    | 0.6007           |
| 14                                | 776         | 785       | 8    | 0.6859           |
| 15                                | 826         | 833       | 6    | 0.6519           |
| 16                                | 835         | 844       | 8    | 0.5509           |
| 17                                | 850         | 852       | 1    | 0.5222           |

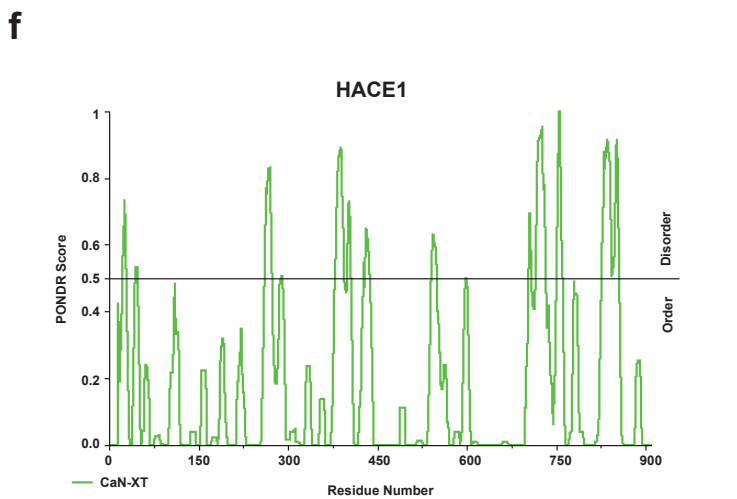

**g**

| CaN-XT predicted disorder segment |             |           |      |                  |
|-----------------------------------|-------------|-----------|------|------------------|
| IDR                               | starting aa | ending aa | size | average strength |
| 1                                 | 23          | 28        | 6    | 0.6312           |
| 2                                 | 44          | 47        | 4    | 0.5311           |
| 3                                 | 261         | 273       | 13   | 0.7262           |
| 4                                 | 288         | 291       | 4    | 0.5065           |
| 5                                 | 379         | 393       | 15   | 0.7682           |
| 6                                 | 400         | 405       | 6    | 0.6402           |
| 7                                 | 427         | 427       | 1    | 0.5442           |
| 8                                 | 429         | 437       | 9    | 0.5954           |
| 9                                 | 541         | 549       | 9    | 0.6014           |
| 10                                | 598         | 600       | 3    | 0.5001           |
| 11                                | 704         | 708       | 5    | 0.6257           |
| 12                                | 715         | 733       | 19   | 0.7890           |
| 13                                | 751         | 760       | 10   | 0.7930           |
| 14                                | 827         | 855       | 29   | 0.7409           |



Figure 1b

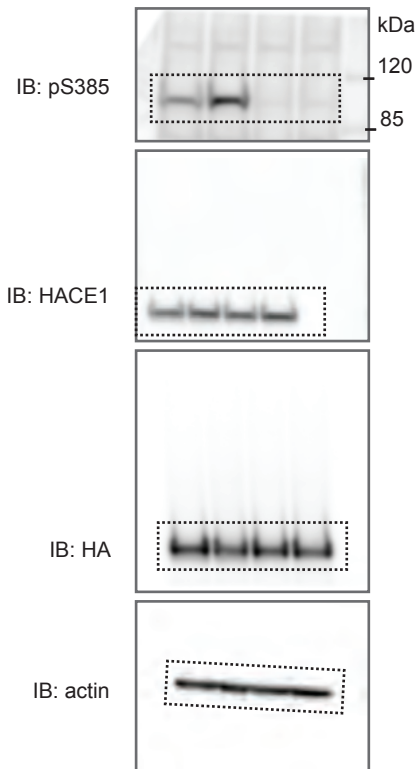

Figure 1d

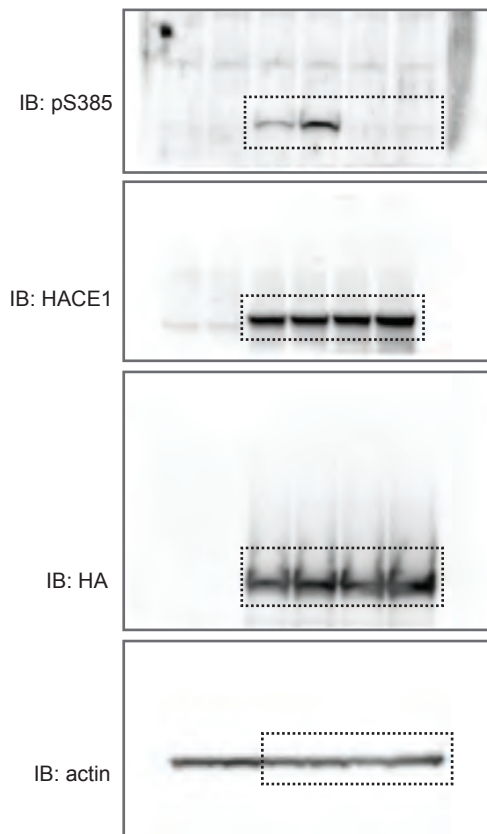

Figure 1e

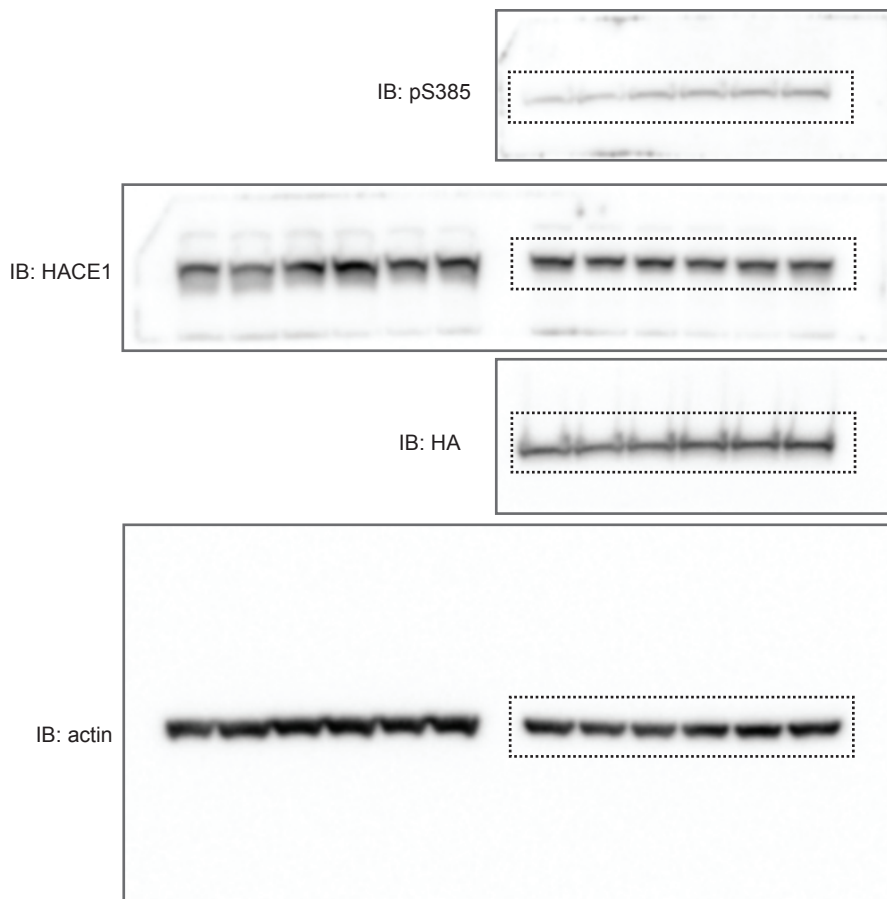

Figure 1f

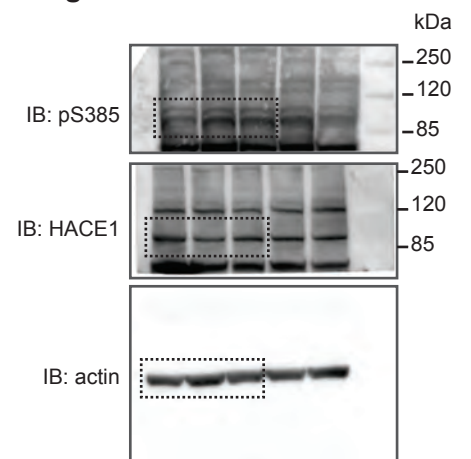

Figure 2a

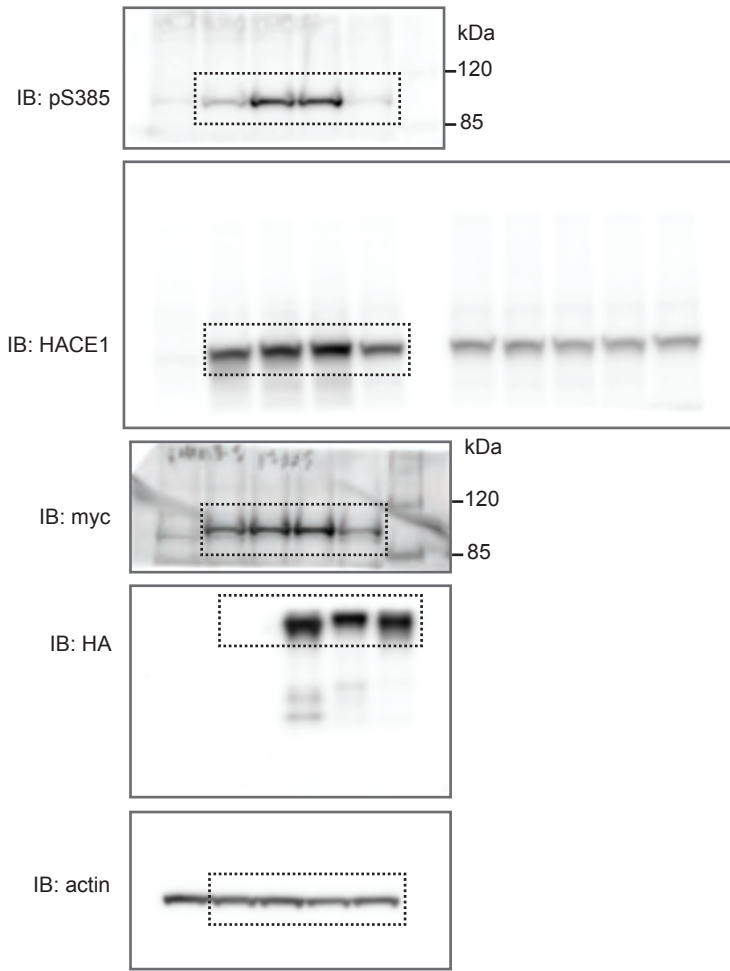

Figure 2c

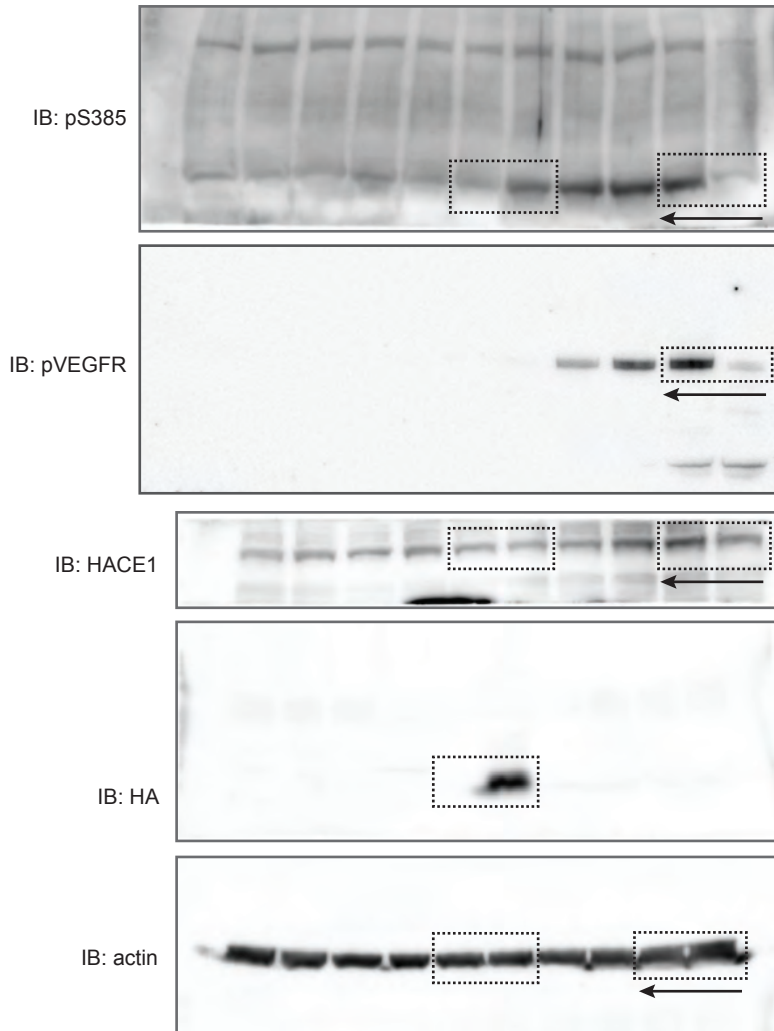

Figure 2f

Figure 2d

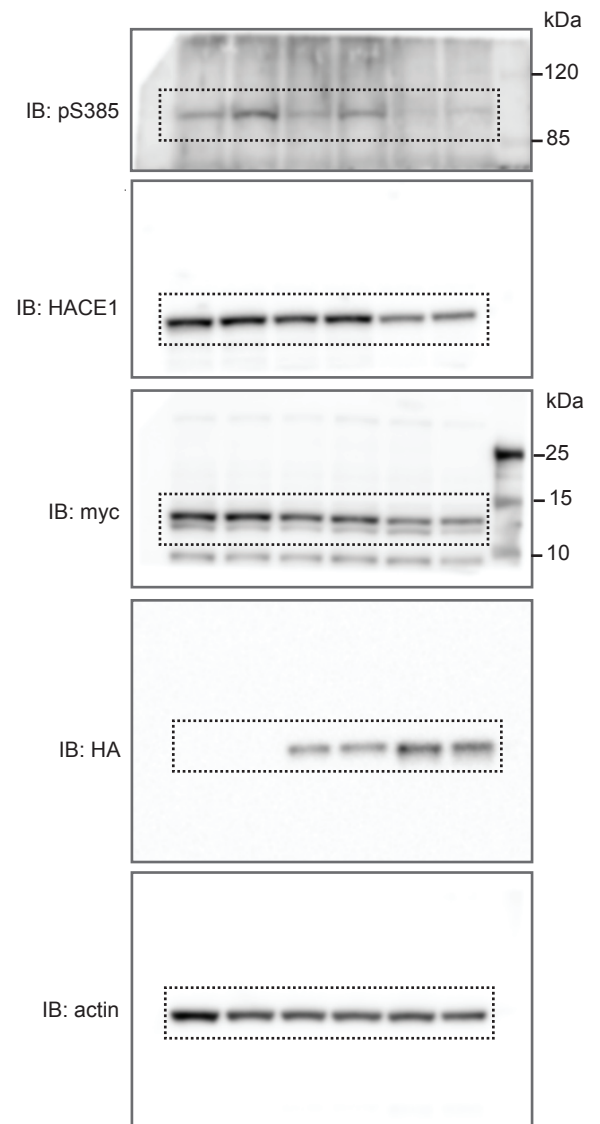

**Figure 3a**

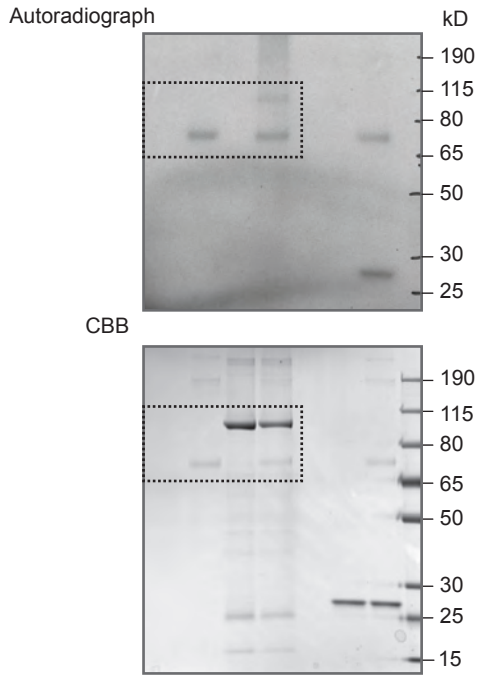

**Figure 3b**

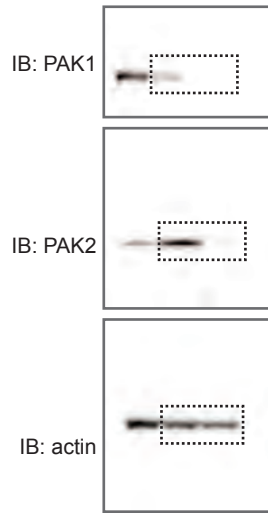

**Figure 3c**

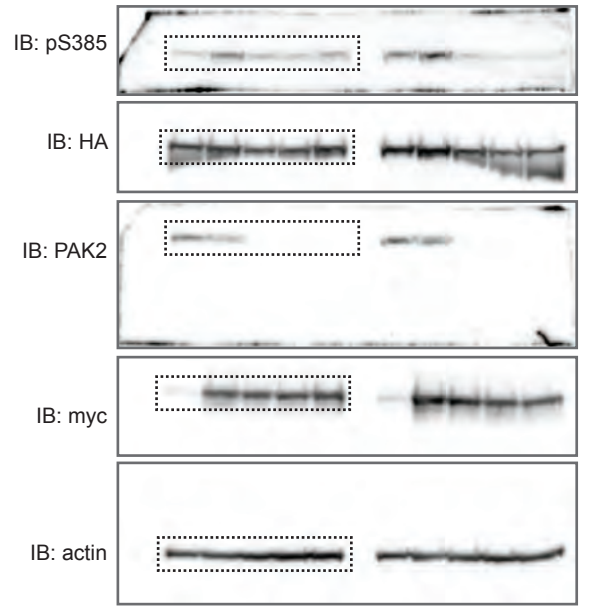

**Figure 3d**

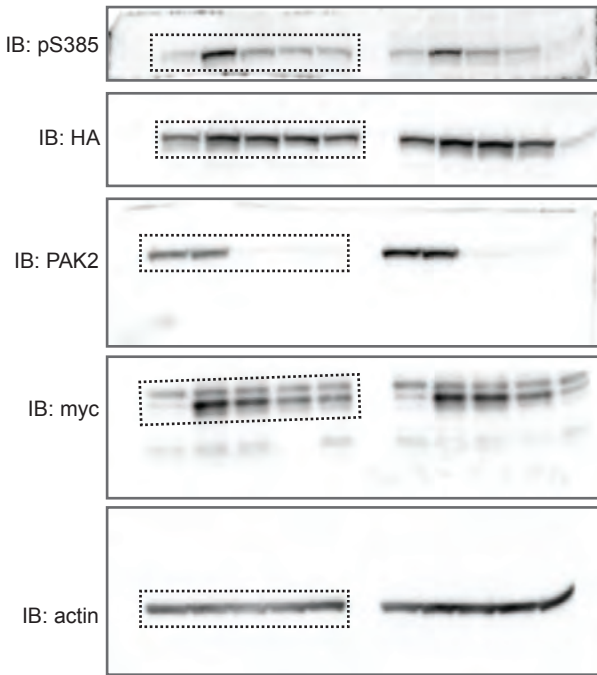

**Figure 3e**

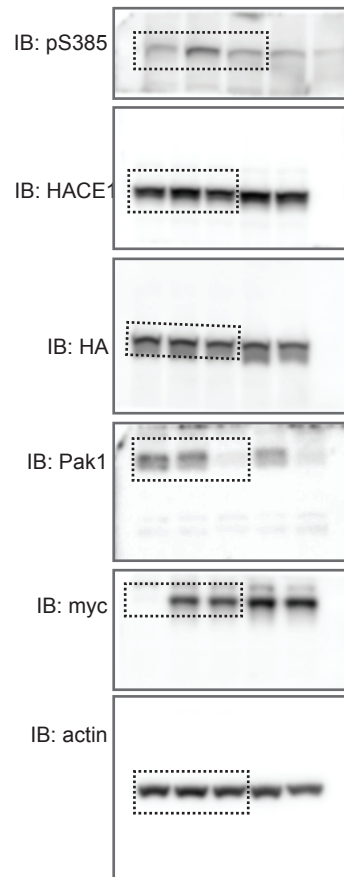

**Figure 3f**

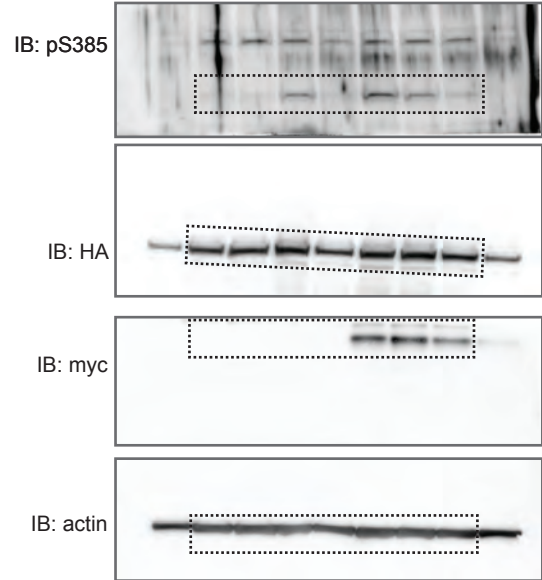

**Figure 3g**

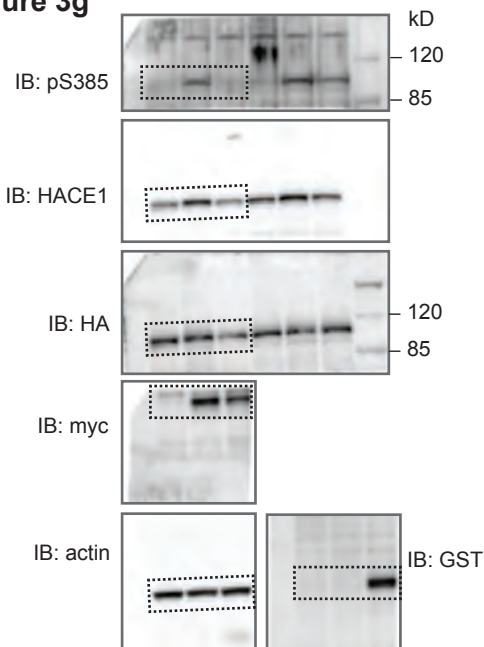

**Figure 3h**

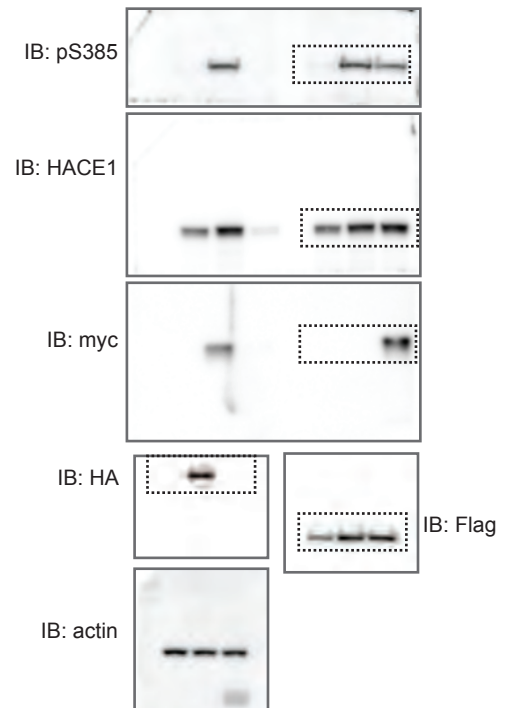

**Figure 4a**

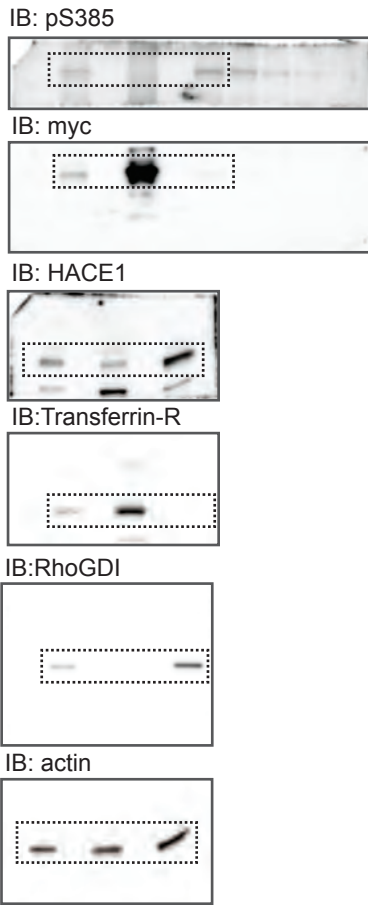

**Figure 4b**

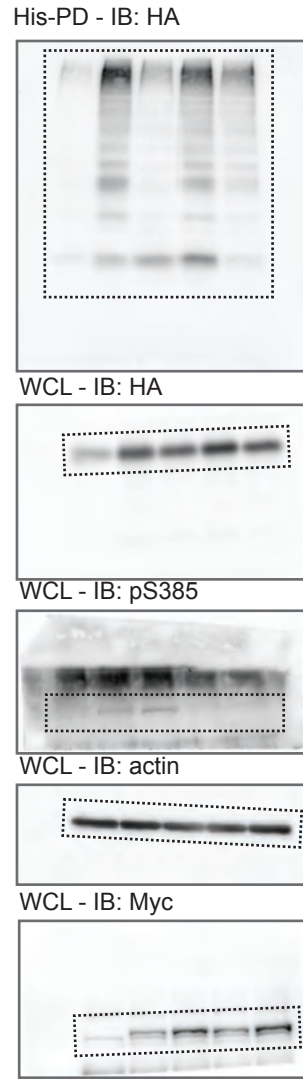

**Figure 4c**

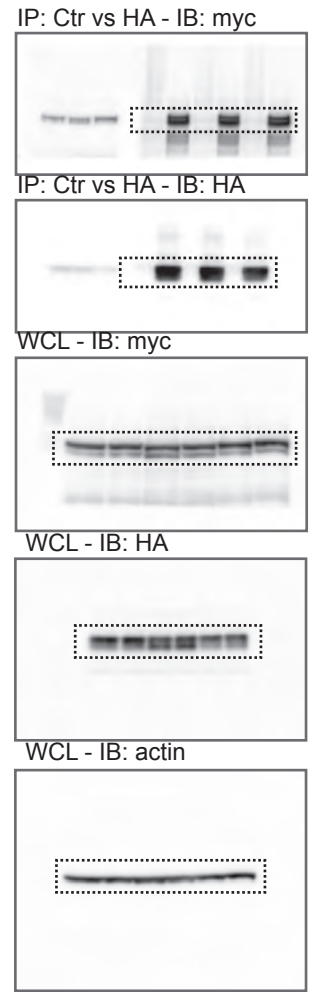

**Figure 4d**

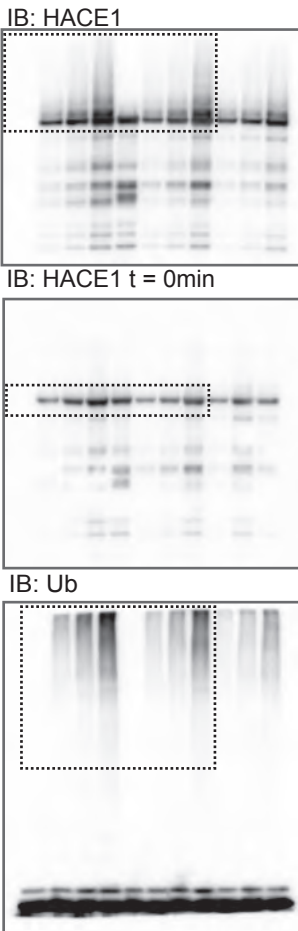

**Figure 4e**

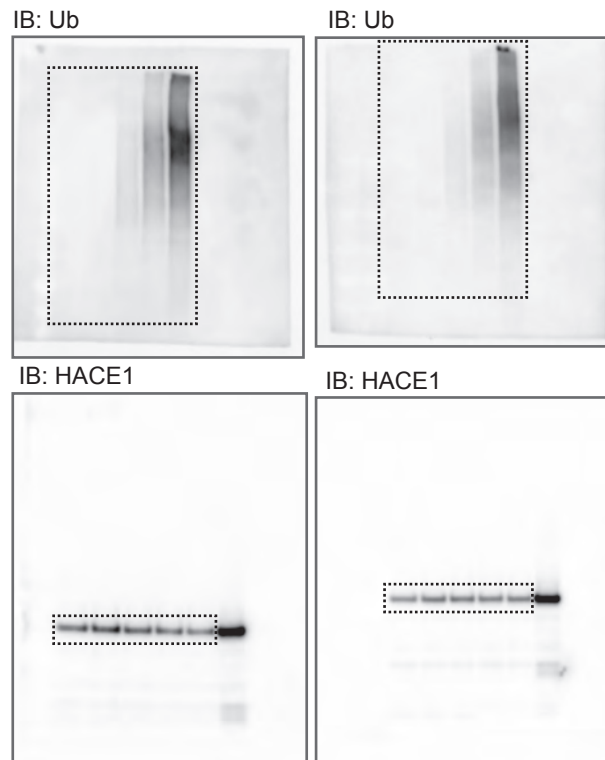

**Figure 4f**

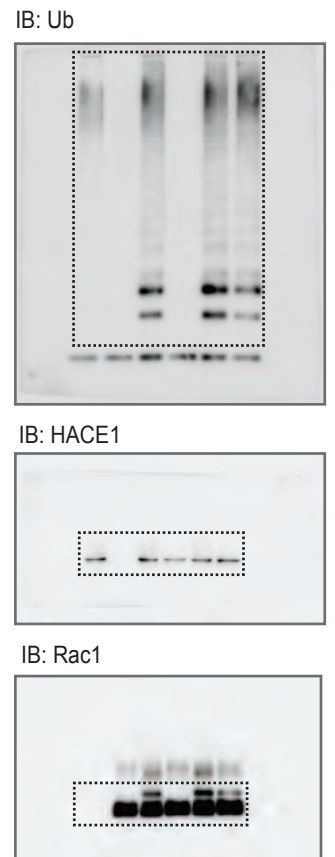

**Figure 5a**

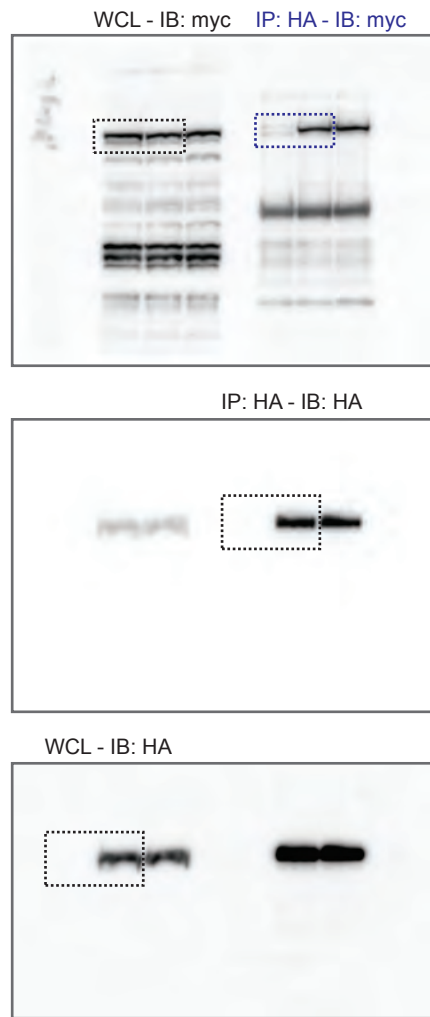

**Figure 5d**

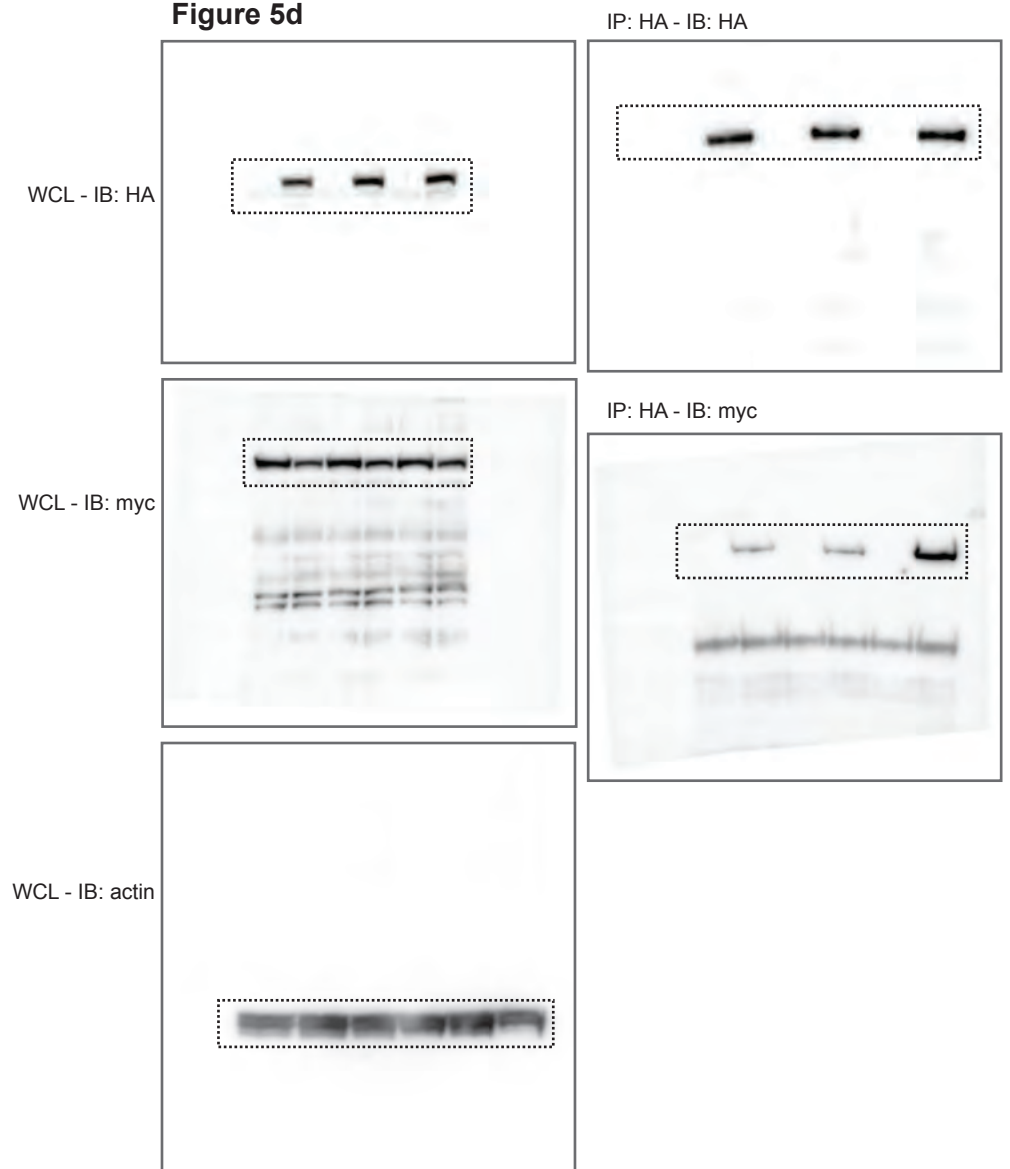

**Figure 5e**

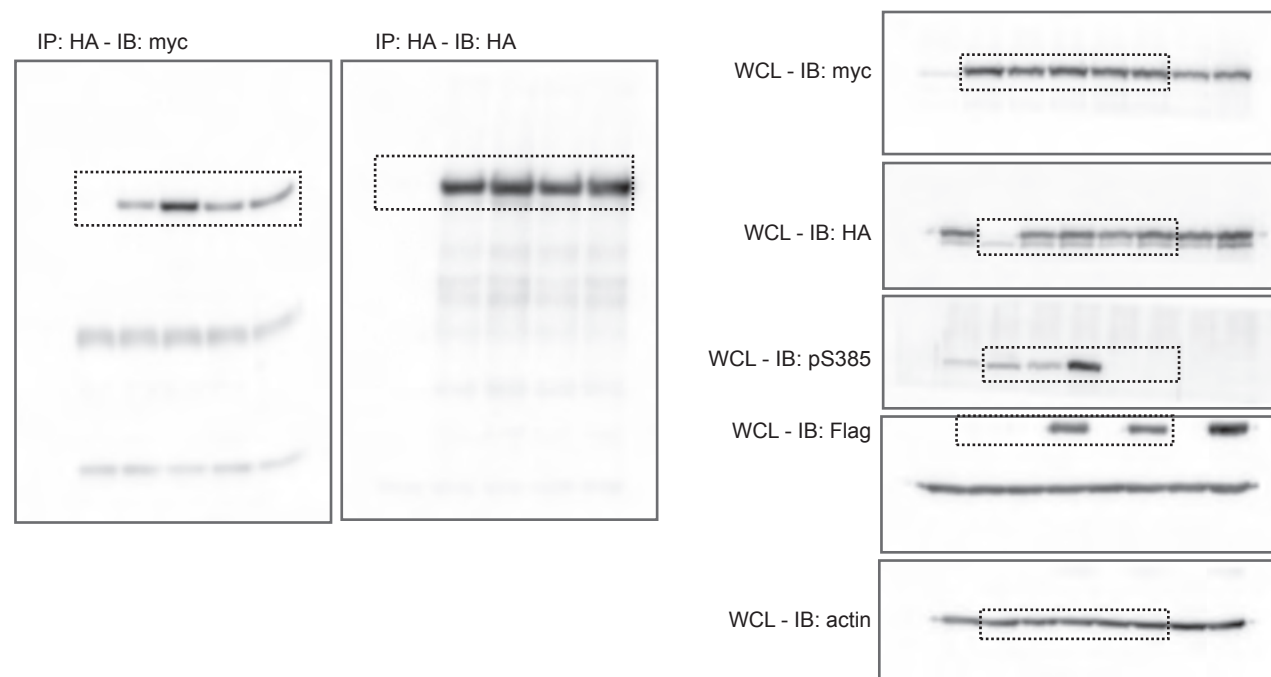

Supplement: 41598_2018_19471_MOESM1_ESM.pdf [file 41598_2018_19471_MOESM1_ESM.pdf]
